# Supplementary material for: Effects of Tormentic Acid and the Extracts from Callistemon citrinus on the Production of Extracellular Proteases by Staphylococcus aureus
Source: Hindawi journal article supplement (doi:10.1155/2020/6926320), 2020-05-01
Supplement: f1 [file 6926320.f1.pdf]

## Supplementary Material

Tormentonic acid used in this study was obtained by column chromatography from leaf extracts of *C. citrinus* in a previous study in our laboratory [8]. The chemical structure, formula and data from mass spectrometry for the fractions obtained from column chromatography are shown in Table 1.

**Table 1: Identity of fractions obtained from *C. citrinus* obtained from column chromatography**

| Fraction          | Yield (g) | Identity         | m/z                                                                                  | Theoretical Mass | Chemical Formula                               |
|-------------------|-----------|------------------|--------------------------------------------------------------------------------------|------------------|------------------------------------------------|
| <b>D1 181-183</b> | 0.0148    | Betulinic acid   | 456.3619                                                                             | 456.3603         | C <sub>30</sub> H <sub>48</sub> O <sub>3</sub> |
|                   |           |                  | 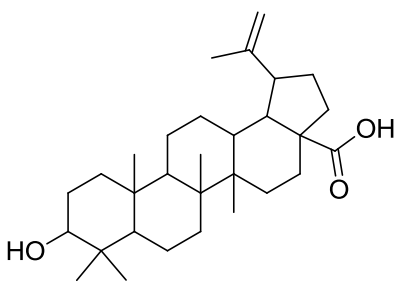   |                  |                                                |
| <b>H1 200-214</b> | 0.4484    | Betulinic acid   | 456.3617                                                                             | 456.3603         | C <sub>30</sub> H <sub>48</sub> O <sub>3</sub> |
| <b>G2 259</b>     | 0.0227    | Betulinic acid   | 456.3617                                                                             | 456.3603         | C <sub>30</sub> H <sub>48</sub> O <sub>3</sub> |
| <b>B1 163-169</b> | 0.0089    | Betulinic acid   | 456.3617                                                                             | 456.3603         | C <sub>30</sub> H <sub>48</sub> O <sub>3</sub> |
| <b>CC 190-192</b> | 0.0212    | Betulinic acid   | 456.3611                                                                             | 456.3603         | C <sub>30</sub> H <sub>48</sub> O <sub>3</sub> |
| <b>R2 335-339</b> | 0.1196    | Tormentonic acid |                                                                                      | 488.3502         | C <sub>30</sub> H <sub>48</sub> O <sub>5</sub> |
|                   |           |                  |  |                  |                                                |
| <b>O2 317-325</b> | 0.0297    | Tormentonic acid | 488.3502                                                                             | 488.3502         | C <sub>30</sub> H <sub>48</sub> O <sub>5</sub> |
| <b>J2 282-284</b> | 0.0380    | Tormentonic acid | 488.3502                                                                             | 456.3603         | C <sub>30</sub> H <sub>48</sub> O <sub>3</sub> |

|                   |        |                            |          |          |                                                |
|-------------------|--------|----------------------------|----------|----------|------------------------------------------------|
| <b>P2 326-330</b> | 0.0297 | Tormentic acid             |          | 488.3502 | C <sub>30</sub> H <sub>48</sub> O <sub>5</sub> |
| <b>K2 285-287</b> | 0.1422 | Tormentic acid             |          | 488.3502 | C <sub>30</sub> H <sub>48</sub> O <sub>5</sub> |
| <b>L2 290-294</b> | 0.1557 | Tormentic acid             |          | 488.3502 | C <sub>30</sub> H <sub>48</sub> O <sub>5</sub> |
| <b>M2 295-307</b> | 0.4117 | Tormentic acid             |          | 488.3502 | C <sub>30</sub> H <sub>48</sub> O <sub>5</sub> |
| <b>N2 308-316</b> | 0.3797 | Tormentic acid             |          | 488.3502 | C <sub>30</sub> H <sub>48</sub> O <sub>5</sub> |
| <b>I2 274-281</b> | 0.2281 | 23-hydroxyurs-12-en-24-oic | 472.9872 | 472.6997 | C <sub>30</sub> H <sub>48</sub> O <sub>4</sub> |

A total mass of 100 g leaf extract of *C. citrinus* was loaded on silica gel. The column was developed using a gradient of 100 % hexane to 100 % ethyl acetate and then finally 10 % methanol. A total of 469 fractions were obtained. Fractions were typically labelled as: fraction 181-183 (D1) identified as betulinic acid, fractions 335-339 (R2) identified as tormentic acid and fraction 274-281 (I2) identified as 23-hydroxyurs-12-en-24-oic using mass spectrometry and nuclear magnetic resonance.

Data from Table 1 indicates that from the isolated and identified compounds, tormentic acid was the most abundant with a total yield of 1.3 % of the loaded sample.

#### Spectral data for tormentic acid obtained by nuclear magnetic resonance:

white powder; <sup>1</sup>H-NMR (DMSO, 400 MHz) δ (ppm): 5.14 (1H, *br s*, H-12), 3.49 (1H, *m*), 2.74 (1H, *d*, *J* = 9.2, H-3), 2.12 (1H, *d*, *J* = 11.2, H-18), 2.00-1.20 (CH<sub>2</sub> and CH region), 1.04 (3H, *s*, H-27), 0.93 (3H, *s*, H-23), 0.93 (3H, *s*, H-25), 0.92 (3H, *s*, H-30), 0.83 (3H, *d*, *J* = 6.4, H-29), 0.77 (1H, *t*, H-5), 0.75 (3H, *s*, H-26), 0.72 (3H, *s*, H-24). <sup>13</sup>C-NMR (DMSO, 100 MHz) δ (ppm); 178.7 (C-28), 138.7 (C-13), 124.9 (C-12), 82.7 (C-3), 70.2 (C-20), 67.6 (C-2), 55.2 (C-5), 52.8 (C-18), 47.5 (C-17), 47.5 (C-1), 47.4 (C-9), 46.4 (C-14), 40.5 (C-10), 39.4 (C-8), 39.3 (C-4), 38.9 (C-21), 38.8 (C-19), 36.8 (C-22), 33.0 (C-7), 30.6 (C-16), 29.3 (C-23), 27.9 (C-15), 23.7 (C-27), 23.4 (C-11), 21.5 (C-30), 18.6 (C-6), 17.6 (C-24), 17.5 (C-26), 17.4 (C-24), 16.9 (C-29), 16.9 (C-25).

Spectra:

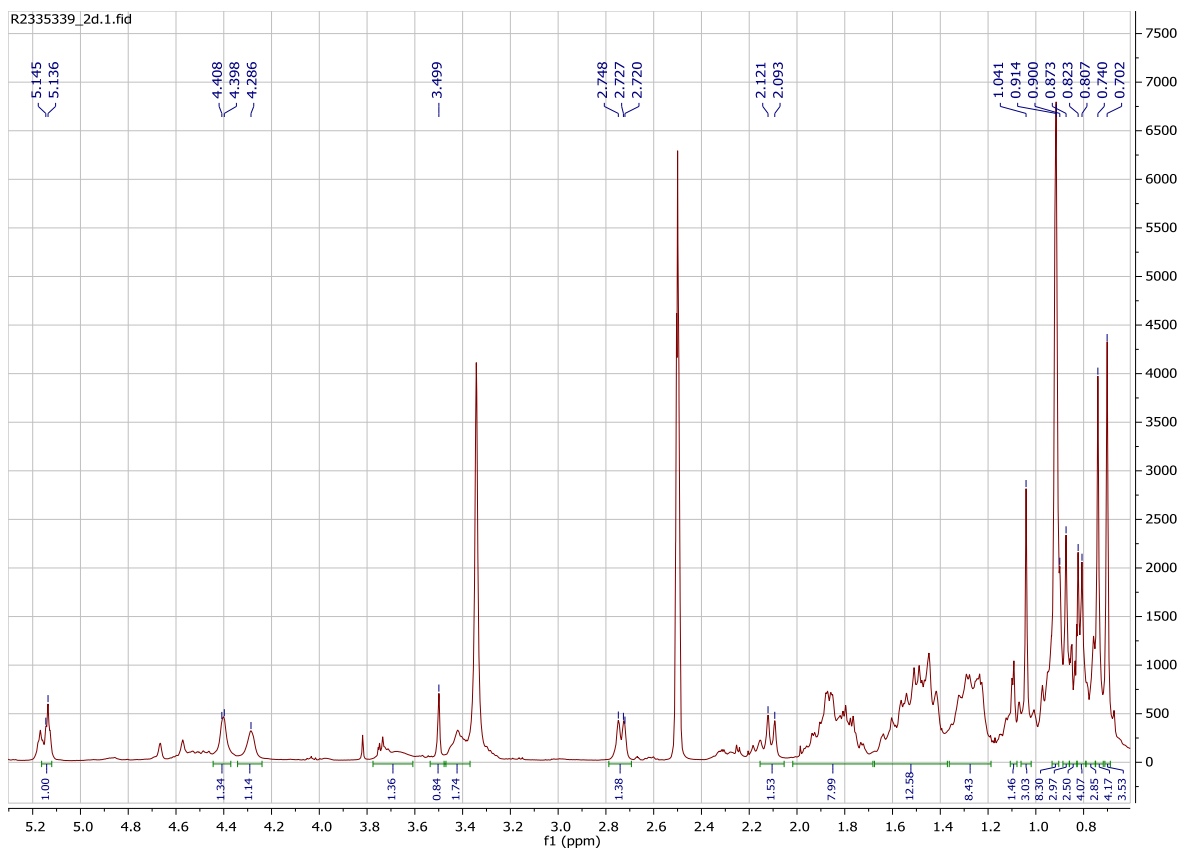

$^1\text{H}$  NMR (DMSO, 400 MHz) Spectrum of R2 335-339.

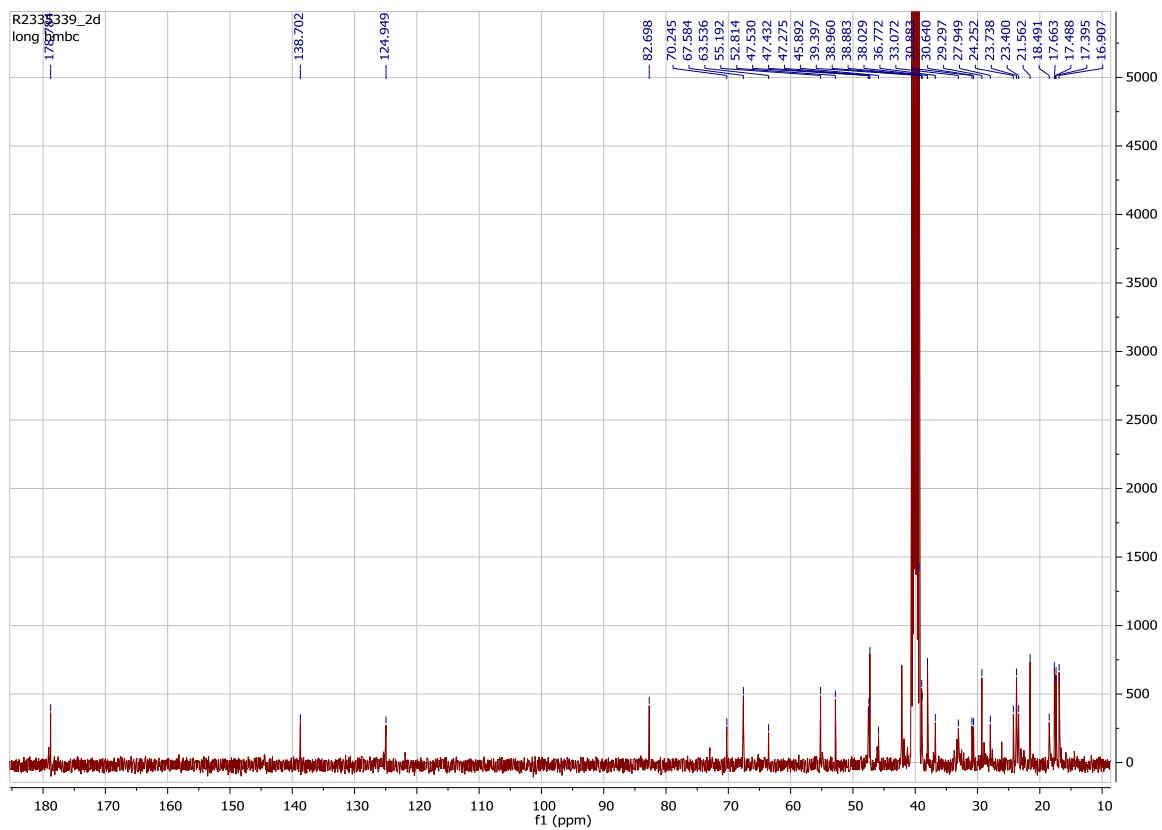

$^{13}\text{C}$  NMR (DMSO, 100 MHz) Spectrum for R2 335-339.

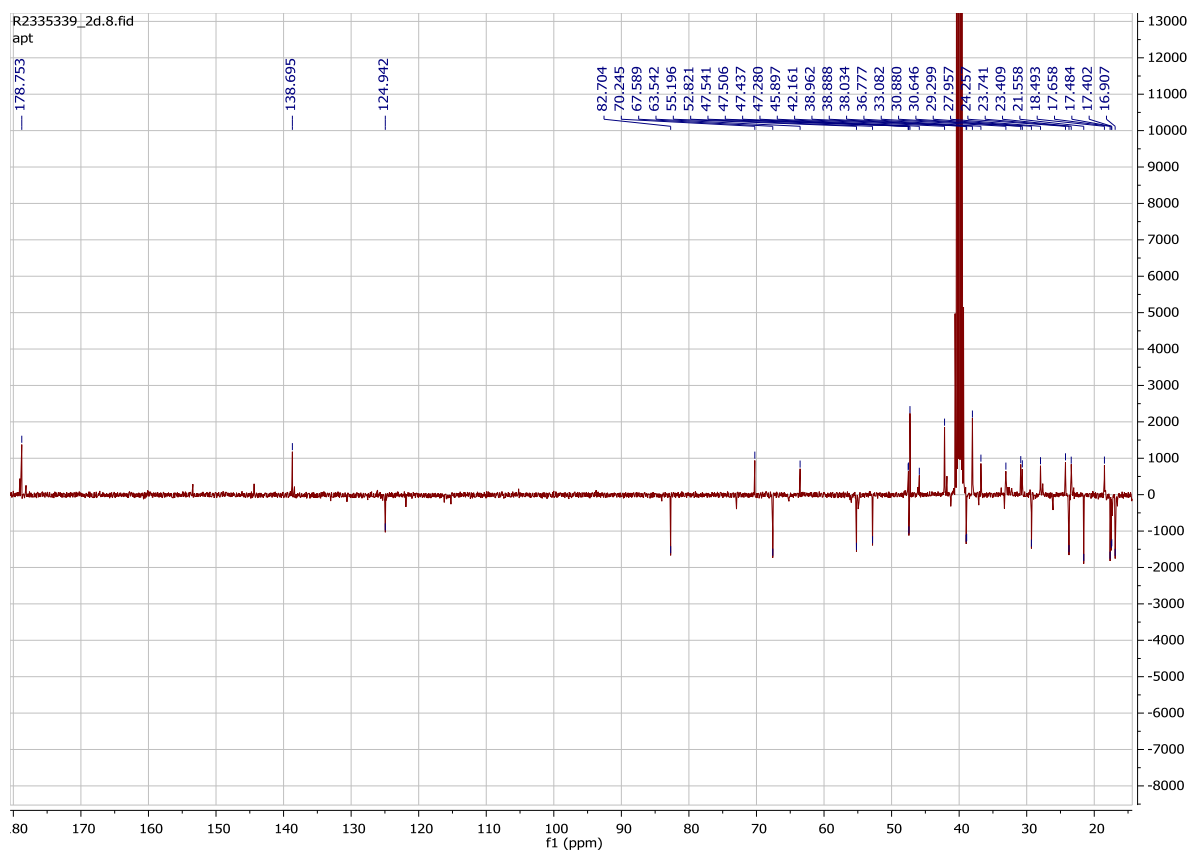

$^{13}\text{C}$  APT-NMR (DMSO, 100 MHz) Spectrum for R2 335-339.
